# Supplementary material for: High efficiency enrichment of low-abundance peptides by novel dual-platform graphene@SiO2@PMMA
Source: Royal Society of Chemistry journal article supplement (doi:10.1039/c2nr31649h), 2012-01-01
Supplement: c2nr31649h.pdf [file c2nr31649h.pdf]

## Supporting Information

### Materials and Chemicals.

Graphene, concentrated nitric acid, tetraethyl orthosilicate (TEOS), ethylene glycol, ethanol, sodium hydroxide, concentrated ammonia solution (28 wt%) and sodium dodecylsulphate are of analytical grade and purchased from Shanghai Chemical Corp. 3-(methacryloyloxy)propyltrimethoxysilane and methyl methacrylate, 99% was purchased from Alfa Aesar (Tianjin, China). Standard peptide (Angiotensin II: Mw=1046.2; Sequence is Asp-Arg-Val-Tyr-Ile-His-Pro-Phe; Purity>97.77%) was purchased from Sangon Biotech (Shanghai) Co., Ltd.. Bovine Serum Albumin (BSA), Horse heart Myoglobin (MYO) were obtained from Bio Basic Inc. (Toronto, Canada).  $\alpha$ -Cyano-4-hydroxy-cinnamic acid (CHCA) was purchased from Sigma (Shanghai, China). Sequencing grade-modified trypsin was purchased from Promega (Madison, WI). Mice were provided by Shanghai Medical College. All of other chemicals are of analytical grade. Milli-Q water prepared using by Milli-Q system (Millipore, Bedford, MA) was used in all experiments.

### Preparation of graphene@SiO<sub>2</sub>@PMMA material

The synthesis of graphene@SiO<sub>2</sub>@PMMA materials involve three steps, showed in scheme 1. Firstly, the pristine graphene flakes were treated in a concentrated nitric acid solution at 60°C for 6h in a three-necked round bottom flask equipped with a mechanical agitation and condenser. Then, the acidizing solution was neutralized by slowly adding NaOH solution until pH 7.0. and collected by centrifugation to obtain the hydrophilic graphene nanosheets, washed with water and dried at 60°C in vacuum. Secondly, the product was obtained by sol-gel process according to previous reports with some modifications<sup>1-3</sup>. Secondly, 50 mg of as-prepared graphene powder was dispersed in 50 ml of deionized water by ultrasonication for 30 min, resulting in a homogeneous dispersion. Additional 400 ml of deionized water and 50ml of 0.01M NaOH solution were added into the dispersion which was further ultrasonicated for 10 minutes and heated at 60°C for 30 minutes under mechanical agitation. Afterwards, 2.5ml of tetraethylorthosilicate (TEOS)/ethanol (v/v: 1/4) solution was added by injection at 60°C for 12 hours. The product was collected by centrifugation and washed with deionized water. Finally, the products were dispersed in 70ml ethanol and 3-(methacryloyloxy)propyltrimethoxysilane was added in the dispersion with a mechanical agitation for 48 hours at 30°C. The sodium dodecylsulphate (5g) and methyl methacrylate(1.0g) were added in the dispersion in sequence and kept the solutions under nitrogen atmosphere and reflux at 70°C for 24 hours. The graphene@SiO<sub>2</sub>@PMMA materials were washed repeatedly with deionized water and ethanol dried at 50°C for 12 hours in vacuum for future use.

### Characterization

Scanning electron microscopy (SEM) images were recorded on a Philips XL30 electron microscope (Netherlands) operating at 20 kV. A thin gold film was sputtered on the sample before characterization. Transmission electron microscopy (TEM) images were taken with a JEOL 2011 microscope (Japan) operating at 200 kV. Fourier-transform infrared (FT-IR) spectra were collected on a Nicolet Fourier spectrophotometer (USA) using KBr pellets.

Preparation of standard protein digests. Bovine serum albumin (BSA)(2mg) and Horse heart Myoglobin (MYO)(2mg) were dissolved in 25mM NH<sub>4</sub>HCO<sub>3</sub> buffer at pH 8.3 and treated with trypsin (2%, w/w) for 16 h at 37 °C respectively. MALDI-TOF MS analysis. MALDI-TOF MS experiments were performed in positive ion mode on a 5800 Proteomics Analyzer (Applied Biosystems, USA) in the reflector TOF detection modes. The sample was excited using a Nd:YAG laser (383 nm) operated at a repetition rate of 200 Hz and acceleration voltage of 20 kV. The MASCOT server was used to interpret the MALDI-TOF MS data by searching the species of mammals for identification of two standard proteins with peptide fingerprint mass spectra.

1D nano-ESI-LC/MS/MS analysis. Nano Aquity UPLC system (Waters Corporation, Milford, USA) connected to an LTQ Orbitrap XL mass spectrometer (Thermo Electron Corp., Bremen, Germany) equipped with an online nanoelectrospray ion source (Michrom Bioresources, Auburn, USA). The separation of the peptides was performed in a Symmetry®C18, 5  $\mu$ m, 180  $\mu$ m id  $\times$  2cm trap-column and a BEH300 C18, 1.7  $\mu$ m, 75  $\mu$ m id  $\times$  15cm reverse phase column (Waters Corporation, Milford, USA).

### References

- 1 K. L. Ding, B. J. Hu, G. M. An, R. T. Tao, H. Y. Zhang, Z. M. Liu, *J. Mater. Chem.* 2009, **19**, 3725-3731.
- 2 W. R. Zhao, J. L. Gu, L. X. Zhang, H. R. Chen, J. L. Shi, *J. Am. Chem. Soc.* 2005, **127**, 8916-8917.
- 3 Y. H. Deng, D. W. Qi, C. H. Deng, X. M. Zhang, D. Y. Zhao, *J. Am. Chem. Soc.* 2008, **130**, 28–29.

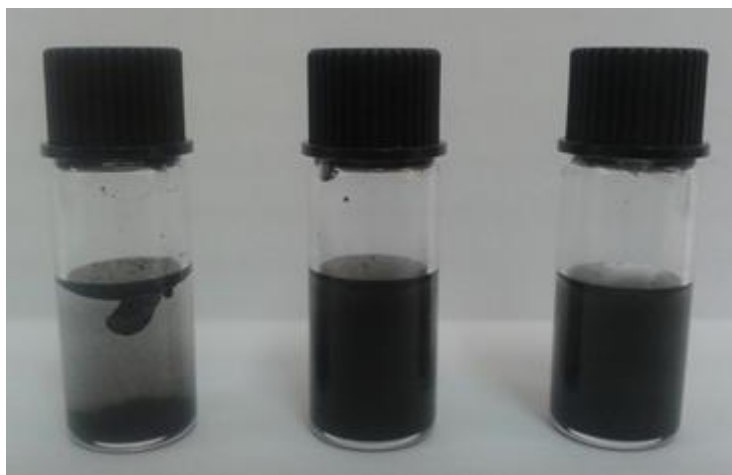

Fig. S1 The photographs of the aqueous dispersion of pristine graphene sheets (left), graphene@SiO<sub>2</sub> (middle) and graphene@SiO<sub>2</sub>@PMMA(right)

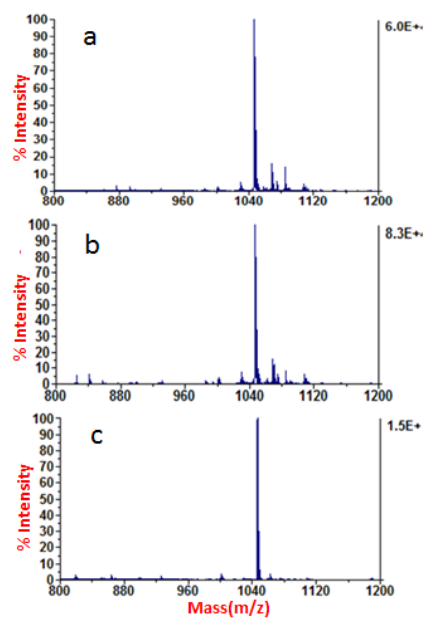

Fig. S2 The mass spectra of 10 nM standard peptides (Angiotensin II: Molecular Weight = 1046.2) enriched by graphene@SiO<sub>2</sub>@PMMA and eluted by different eluents a) 0.4M, b) 1M ammonia water, c) mixture containing 50% acetonitrile and 0.1% trifluoroacetic acid.

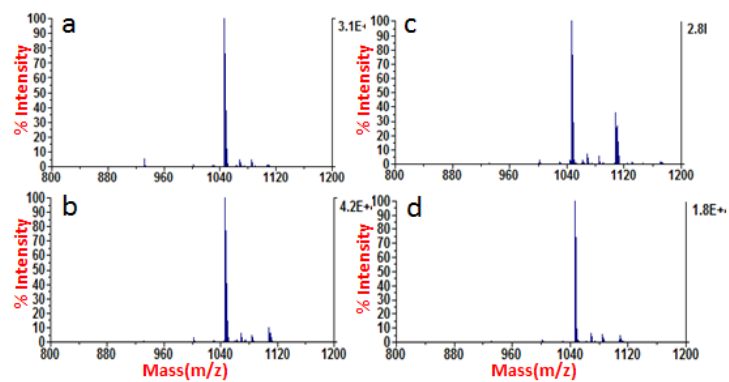

Fig. S3 The Mass spectra of 10 nM standard peptides (Angiotensin II: Molecular Weight = 1046.2) enriched by different amount of materials a) 5 μL, b) 10 μL, c) 15 μL, d) 20 μL, 10mg/ml in water.

Table S1 Peptides of myoglobin digest enriched by graphene@SiO<sub>2</sub>@PMMA materials and identified by MALDI-TOF MASS

| Start-End | Observed | Mr(expt) | Mr(calc) | Delta   | Miss | Sequence              |
|-----------|----------|----------|----------|---------|------|-----------------------|
| 18-32     | 1606.782 | 1605.775 | 1605.848 | -0.0725 | 0    | K.VEADIAGHGQEVLR.L    |
| 33-43     | 1271.601 | 1270.594 | 1270.656 | -0.0619 | 0    | R.LFTGHPETLEK.F       |
| 81-97     | 1853.865 | 1852.857 | 1852.954 | -0.0969 | 0    | K.GHHEAELKPLAQSHATK.H |
| 120-134   | 1502.585 | 1501.578 | 1501.662 | -0.0841 | 0    | K.HPGDFGADAQGMATK.A   |
| 135-146   | 1361.68  | 1360.673 | 1359.751 | 0.9216  | 1    | K.ALELFRNDIAAK.Y      |
| 147-154   | 941.4443 | 940.4371 | 940.4654 | -0.0284 | 1    | K.YKELGFQG-           |

Table S2 Peptides of albumin bovine serum digest enriched by graphene@SiO<sub>2</sub>@PMMA materials and identified by MALDI-TOF MASS

| Start-End | Observed | Mr(expt) | Mr(calc) | Delta   | Miss | Sequence             |
|-----------|----------|----------|----------|---------|------|----------------------|
| 37-44     | 974.5095 | 973.5022 | 973.4505 | 0.0517  | 0    | K.DLGEEHFK.G         |
| 66-75     | 1163.647 | 1162.64  | 1162.623 | 0.0163  | 0    | K.LVNELTEFAK.T       |
| 161-167   | 927.549  | 926.5417 | 926.4861 | 0.0556  | 0    | K.YLYEIAR.R          |
| 402-412   | 1305.733 | 1304.726 | 1304.709 | 0.0172  | 0    | K.HLVDEPQNLIK.Q      |
| 421-433   | 1479.829 | 1478.822 | 1478.788 | 0.0335  | 0    | K.LGEYGFQNALIVR.Y    |
| 437-451   | 1639.974 | 1638.967 | 1638.931 | 0.0364  | 1    | R.KVPQVSTPTLVEVSR.S  |
| 438-451   | 1511.874 | 1510.867 | 1510.836 | 0.0316  | 0    | K.VPQVSTPTLVEVSR.S   |
| 508-523   | 1823.95  | 1822.942 | 1822.892 | 0.05    | 0    | R.RPCFSALTPDETYVPK.A |
| 588-597   | 1050.491 | 1049.483 | 1049.485 | -0.0017 | 0    | K.EACFAVEGPK.L       |

Table S3 the peptides and small molecular proteins of mouse brain enriched by graphene@SiO<sub>2</sub>@PMMA and identified by ID nano-ESI-LC/MS/MS.

| MH+        | z | Peptide                                 | XC    |
|------------|---|-----------------------------------------|-------|
| 1383.74130 | 2 | C.GVCNGATAKISHLL.S                      | 2.099 |
| 2070.01451 | 3 | P.ERPGPPQRAQQM*TGTKSQGP                 | 2.630 |
| 2490.33510 | 3 | M.LLGSLAFLGADTAGPDTPSQFRKK.W            | 2.524 |
| 1479.79544 | 2 | K.LGEYGFQNAILVR.Y                       | 2.676 |
| 1479.79544 | 2 | K.LGEYGFQNAILVR.Y                       | 3.184 |
| 1133.57382 | 2 | Y.WPHQPIENL.-                           | 2.338 |
| 1196.52119 | 2 | S.SDSMDTGAGSIR.E                        | 2.411 |
| 1196.52119 | 2 | S.SDSMDTGAGSIR.E                        | 2.850 |
| 2069.96689 | 3 | S.SDSMDTGAGSIREAGGAFGKR.E               | 3.149 |
| 2156.99892 | 3 | D.SDSMDTGAGSIREAGGAFGKR.E               | 2.705 |
| 2914.44287 | 2 | Y.SVAVPAFSQGLDDYGARVSSGSGTLVSTV.-       | 2.587 |
| 1632.84524 | 3 | R.SGSAKVAFSAIRSTNH.E                    | 2.637 |
| 1632.84524 | 2 | R.SGSAKVAFSAIRSTNH.E                    | 2.865 |
| 1632.84524 | 2 | R.SGSAKVAFSAIRSTNH.E                    | 2.899 |
| 1459.83011 | 2 | R.SVLMMLKQTPLSR.-                       | 2.115 |
| 1718.77689 | 2 | F.HNPHVNPLPTGYEDE.-                     | 2.225 |
| 1718.77689 | 2 | F.HNPHVNPLPTGYEDE.-                     | 2.364 |
| 1438.80125 | 2 | R.IVAPPGGRSNITSLG.-                     | 2.359 |
| 1422.80634 | 2 | R.IVAPPGGRANITSLG.-                     | 2.398 |
| 1468.81182 | 2 | R.IVAPPGGRSNITSLS.-                     | 2.222 |
| 1734.89086 | 2 | G.GPDEPITVAHIVVEATS.L                   | 2.048 |
| 1712.04288 | 2 | A.VGVKAVDKKAAGAGKVT.K                   | 2.846 |
| 1712.04288 | 2 | A.VGVKAVDKKAAGAGKVT.K                   | 2.506 |
| 1799.90617 | 2 | R.LVDNIFPEDPEDGLVK.T                    | 2.204 |
| 1375.74274 | 2 | K.SSLVTSKLAGGQVE.-                      | 3.019 |
| 1375.74274 | 2 | K.SSLVTSKLAGGQVE.-                      | 3.096 |
| 1288.71071 | 2 | S.SLVTSKLAGGQVE.-                       | 2.361 |
| 3648.88276 | 4 | R.TKQVEKNDEDQKIEQDGVKPEDKAHKAATKIQ.A    | 3.299 |
| 3648.88276 | 5 | R.TKQVEKNDEDQKIEQDGVKPEDKAHKAATKIQ.A    | 3.082 |
| 3876.02098 | 5 | R.RTKQVEKNDEDQKIEQDGVKPEDKAHKAATKIQ.A.S | 3.202 |
| 3876.02098 | 5 | R.RTKQVEKNDEDQKIEQDGVKPEDKAHKAATKIQ.A.S | 3.701 |
| 3876.02098 | 5 | R.RTKQVEKNDEDQKIEQDGVKPEDKAHKAATKIQ.A.S | 3.446 |
| 3719.91987 | 4 | R.TKQVEKNDEDQKIEQDGVKPEDKAHKAATKIQ.A.S  | 4.004 |
| 3490.77723 | 4 | K.QVEKNDEDQKIEQDGVKPEDKAHKAATKIQ.A.S    | 3.684 |
| 1250.56477 | 2 | R.KQNDVFGVGEADQ.-                       | 2.138 |
| 3179.66818 | 5 | L.NPDLVAVVTIVDNDLDTGAASVVPVTVAGTVAV.D   | 3.069 |
| 2134.11724 | 2 | H.KDIAVSLVAASDGATVTCVTTRG.D             | 2.327 |
| 1551.75840 | 3 | R.SKYLATASTMDHAR.H                      | 3.230 |
| 1201.64632 | 2 | L.LFPLENIDQ.V                           | 2.161 |

|            |   |                                                      |       |
|------------|---|------------------------------------------------------|-------|
| 1028.55236 | 2 | R.PKWKWDNQ.K                                         | 2.262 |
| 1239.68443 | 2 | C.HVITWERIVS.H                                       | 2.105 |
| 1383.74782 | 2 | S.RSELDVPVEILN.I                                     | 2.016 |
| 3194.67389 | 5 | S.KANLSSLSKRYRQDAKYLMN*RSTYAK.L                      | 3.569 |
| 1734.86255 | 2 | S.RVMEQSRKNVEME.R                                    | 2.182 |
| 4961.56904 | 5 | Q.TVRYKYGHNAGEATHNAVDSAINVGLTAYNIDNIGIKAM*VKKTAKQ.T  | 3.272 |
| 2581.42089 | 4 | S.QNQKQGPFRLEDALKALDVAAL.Q                           | 3.018 |
| 3413.78456 | 4 | S.ASFLNQKQEVEKLEKQDRLQCPNAQVKE.K                     | 3.258 |
| 1281.67322 | 2 | -.MREIVHIQAGQ.C                                      | 2.899 |
| 1281.67322 | 2 | -.MREIVHIQAGQ.C                                      | 2.965 |
| 1702.88979 | 2 | F.SVVPSPKVSDTVVEPY.N                                 | 2.026 |
| 4961.55328 | 5 | P.SVSLPPPAQVSSVPSLNQPYGEGLCVSLDPLPPLPPLPPLPPEDPEQP.P | 3.761 |
| 4961.55328 | 5 | P.SVSLPPPAQVSSVPSLNQPYGEGLCVSLDPLPPLPPLPPLPPEDPEQP.P | 3.611 |
